# Supplementary material
Source: PubMed Central journal article supplement (PMC5235966)
Supplement: NIHMS835612-supplement-8.pdf [file NIHMS835612-supplement-8.pdf]

**Table S2. Strains and Plasmids, Related to STAR Methods**

| strain ID<br>(RAU##,<br>pRAU###) | species        | strain    | genotype                                                                                                           | plasmid                    | drug res.           |
|----------------------------------|----------------|-----------|--------------------------------------------------------------------------------------------------------------------|----------------------------|---------------------|
| 1                                | <i>Lmo</i>     | 10403S    | wt                                                                                                                 | -                          | -                   |
| 3                                | <i>E. coli</i> | DH5a      | -                                                                                                                  | pKSV7                      | amp <sub>100</sub>  |
| 13                               | <i>Lmo</i>     | SLCC2482  | wt                                                                                                                 | -                          | -                   |
| 14                               | <i>Lmo</i>     | SLCC2540  | wt                                                                                                                 | -                          | -                   |
| 19                               | <i>Lmo</i>     | J0161     | wt                                                                                                                 | -                          | -                   |
| 29                               | <i>E. coli</i> | DH5a      | -                                                                                                                  | pKSV7-S1 <sub>J0161</sub>  | amp <sub>100</sub>  |
| 31                               | <i>E. coli</i> | DH5a      | -                                                                                                                  | pKSV7-S1 <sub>10403S</sub> | amp <sub>100</sub>  |
| 57                               | <i>Lmo</i>     | 10403S    | ϕ10403S cure (ComK <sup>+</sup> )                                                                                  | -                          | -                   |
| 46                               | <i>E. coli</i> | DB3.1     | -                                                                                                                  | pPL2xoeL                   | chlor <sub>34</sub> |
| 71                               | <i>Lmo</i>     | 10403S    | ΔComK::ϕJ0161a                                                                                                     | -                          | -                   |
| 100                              | <i>E. coli</i> | NEB5alpha | -                                                                                                                  | pPL2oexL-ϕJ0161a-frag6     | chlor <sub>34</sub> |
| 101                              | <i>E. coli</i> | NEB5alpha | -                                                                                                                  | pPL2oexL-ϕJ0161a-frag7     | chlor <sub>34</sub> |
| 102                              | <i>E. coli</i> | NEB5alpha | -                                                                                                                  | pPL2oexL-ϕJ0161a-frag9     | chlor <sub>34</sub> |
| 103                              | <i>E. coli</i> | NEB5alpha | -                                                                                                                  | pPL2oexL-ϕJ0161a-frag10    | chlor <sub>34</sub> |
| 104                              | <i>E. coli</i> | NEB5alpha | -                                                                                                                  | pPL2oexL-ϕJ0161a-frag5     | chlor <sub>34</sub> |
| 105                              | <i>E. coli</i> | NEB5alpha | -                                                                                                                  | pPL2oexL-ϕJ0161a-frag3     | chlor <sub>34</sub> |
| 106                              | <i>E. coli</i> | NEB5alpha | -                                                                                                                  | pPL2oexL-ϕJ0161a-frag1     | chlor <sub>34</sub> |
| 107                              | <i>E. coli</i> | DH5a      | -                                                                                                                  | pKSV7-ΔCas9                | amp <sub>100</sub>  |
| 109                              | <i>E. coli</i> | NEB5alpha | -                                                                                                                  | pPL2oexL-ϕJ0161a-frag8     | chlor <sub>34</sub> |
| 111                              | <i>E. coli</i> | NEB5alpha | -                                                                                                                  | pPL2oexL-ϕJ0161a-frag2     | chlor <sub>34</sub> |
| 112                              | <i>Lmo</i>     | 10403S    | ComK <sup>+</sup> , ΔtRNA <sup>Arg</sup> ::pRAU100                                                                 | -                          | tet <sub>2</sub>    |
| 113                              | <i>Lmo</i>     | 10403S    | ComK <sup>+</sup> , ΔtRNA <sup>Arg</sup> ::pRAU101                                                                 | -                          | tet <sub>2</sub>    |
| 114                              | <i>Lmo</i>     | 10403S    | ComK <sup>+</sup> , ΔtRNA <sup>Arg</sup> ::pRAU102                                                                 | -                          | tet <sub>2</sub>    |
| 115                              | <i>Lmo</i>     | 10403S    | ComK <sup>+</sup> , ΔtRNA <sup>Arg</sup> ::pRAU103                                                                 | -                          | tet <sub>2</sub>    |
| 116                              | <i>Lmo</i>     | 10403S    | ComK <sup>+</sup> , ΔtRNA <sup>Arg</sup> ::pRAU105                                                                 | -                          | tet <sub>2</sub>    |
| 117                              | <i>Lmo</i>     | 10403S    | ComK <sup>+</sup> , ΔtRNA <sup>Arg</sup> ::pRAU106                                                                 | -                          | tet <sub>2</sub>    |
| 118                              | <i>Lmo</i>     | 10403S    | ComK <sup>+</sup> , ΔtRNA <sup>Arg</sup> ::pRAU109                                                                 | -                          | tet <sub>2</sub>    |
| 120                              | <i>E. coli</i> | NEB5alpha | -                                                                                                                  | pPL2oexL-Cas9              | chlor <sub>34</sub> |
| 123                              | <i>E. coli</i> | NEB5alpha | -                                                                                                                  | pPL2oexL-ϕJ0161a-frag4     | chlor <sub>34</sub> |
| 128                              | <i>Lmo</i>     | 10403S    | ComK <sup>+</sup> , ΔtRNA <sup>Thr</sup> ::pRAU104                                                                 | -                          | tet <sub>2</sub>    |
| 130                              | <i>Lmo</i>     | 10403S    | ComK <sup>+</sup> , ΔCas9                                                                                          | -                          | -                   |
| 142                              | <i>Lmo</i>     | 10403S    | ΔComK::ϕJ0161a ΔCas9                                                                                               | -                          | -                   |
| 144                              | <i>Lmo</i>     | 10403S    | ComK <sup>+</sup> , ΔCas9 ΔtRNA <sup>Arg</sup> ::pRAU120<br>ΔComK::ϕJ0161a ΔCas9<br>ΔtRNA <sup>Arg</sup> ::pRAU120 | -                          | tet <sub>2</sub>    |
| 151                              | <i>Lmo</i>     | 10403S    | ComK <sup>+</sup> , ΔtRNA <sup>Arg</sup> ::pRAU153                                                                 | -                          | tet <sub>2</sub>    |
| 153                              | <i>E. coli</i> | NEB5alpha | -                                                                                                                  | pPL2oexL-LMOG_03145        | chlor <sub>34</sub> |
| 155                              | <i>E. coli</i> | NEB5alpha | -                                                                                                                  | pPL2oexL-LMOG_03146        | chlor <sub>34</sub> |
| 157                              | <i>E. coli</i> | NEB5alpha | -                                                                                                                  | pPL2oexL-LMOG_03147        | chlor <sub>34</sub> |
| 159                              | <i>Lmo</i>     | 10403S    | ComK <sup>+</sup> , ΔtRNA <sup>Arg</sup> ::pRAU153                                                                 | -                          | tet <sub>2</sub>    |
| 160                              | <i>Lmo</i>     | 10403S    | ComK <sup>+</sup> , ΔtRNA <sup>Arg</sup> ::pRAU155                                                                 | -                          | tet <sub>2</sub>    |
| 161                              | <i>Lmo</i>     | 10403S    | ComK <sup>+</sup> , ΔtRNA <sup>Arg</sup> ::pRAU157                                                                 | -                          | tet <sub>2</sub>    |
| 162                              | <i>E. coli</i> | NEB5alpha | -                                                                                                                  | pPL2oexL-LMOG_03148        | chlor <sub>34</sub> |
| 165                              | <i>Lmo</i>     | 10403S    | ComK <sup>+</sup> , tRNA <sup>Arg</sup> ::pRAU162                                                                  | -                          | tet <sub>2</sub>    |
| 167                              | <i>E. coli</i> | DH5a      | -                                                                                                                  | pBAD24                     | amp <sub>100</sub>  |
| 168                              | <i>E. coli</i> | NEB5alpha | -                                                                                                                  | pBAD24-LMOG_03146          | amp <sub>100</sub>  |
| 171                              | <i>E. coli</i> | NEB5alpha | -                                                                                                                  | pBAD24-LMOG_03147          | amp <sub>100</sub>  |
| 173                              | <i>E. coli</i> | NEB5alpha | -                                                                                                                  | pBAD24-LMOG_03148          | amp <sub>100</sub>  |
| 233                              | <i>E. coli</i> | NEB5alpha | -                                                                                                                  | pKSV7-ΔLMOG_03146-7        | amp <sub>100</sub>  |
| 239                              | <i>Lmo</i>     | 10403S    | ComK <sup>+</sup> , tRNA <sup>Arg</sup> ::pCW3                                                                     | -                          | tet <sub>2</sub>    |

|     |            |        |                                     |   |                  |
|-----|------------|--------|-------------------------------------|---|------------------|
| 241 | <i>Lmo</i> | 10403S | ComK <sup>+</sup> ; tRNAArg::pCW7   | - | tet <sub>2</sub> |
| 243 | <i>Lmo</i> | 10403S | ComK <sup>+</sup> ; tRNAArg::pCSW9  | - | tet <sub>2</sub> |
| 246 | <i>Lmo</i> | 10403S | ΔComK::phi_J0161a ΔacrIIA1-2        | - | -                |
| 257 | <i>Lmo</i> | 10403S | ComK <sup>+</sup> ; tRNAArg::pCSW29 | - | tet <sub>2</sub> |
| 259 | <i>Lmo</i> | 10403S | ComK <sup>+</sup> ; tRNAArg::pCSW33 | - | tet <sub>2</sub> |
| 260 | <i>Lmo</i> | 10403S | ComK <sup>+</sup> ; tRNAArg::pCSW35 | - | tet <sub>2</sub> |

| strain ID<br>(CSW##,<br>pCSW##) | species        | strain    | genotype | plasmid                   | drug res.           |
|---------------------------------|----------------|-----------|----------|---------------------------|---------------------|
| 3                               | <i>E. coli</i> | NEB5alpha | -        | pPL2oexL-Imoslcc2482_0685 | chlor <sub>34</sub> |
| 7                               | <i>E. coli</i> | NEB5alpha | -        | pPL2oexL-Imoslcc2540_1277 | chlor <sub>34</sub> |
| 9                               | <i>E. coli</i> | NEB5alpha | -        | pPL2oexL-LMOG_02993       | chlor <sub>34</sub> |
| 13                              | <i>E. coli</i> | NEB5alpha | -        | pBAD24-Imoslcc2482_0685   | amp <sub>100</sub>  |
| 18                              | <i>E. coli</i> | NEB5alpha | -        | pBAD24-Imoslcc2540_1277   | amp <sub>100</sub>  |
| 21                              | <i>E. coli</i> | NEB5alpha | -        | pBAD24-LMOG_02993         | amp <sub>100</sub>  |
| 26                              | <i>E. coli</i> | NEB5alpha | -        | pBAD24- Axx13_03345       | amp <sub>100</sub>  |
| 29                              | <i>E. coli</i> | NEB5alpha | -        | pPL2oexL-Imoslcc2482_0688 | chlor <sub>34</sub> |
| 33                              | <i>E. coli</i> | NEB5alpha | -        | pPL2oexL-Imoslcc2540_1278 | chlor <sub>34</sub> |
| 35                              | <i>E. coli</i> | NEB5alpha | -        | pPL2oexL-LMOG_02992       | chlor <sub>34</sub> |
| 65                              | <i>E. coli</i> | NEB5alpha | -        | pBAD24-Imoslcc2482_0688   | amp <sub>100</sub>  |

| strain ID<br>(MS#) | species        | strain  | genotype                                                            | plasmid | drug res.                                                                         |
|--------------------|----------------|---------|---------------------------------------------------------------------|---------|-----------------------------------------------------------------------------------|
| 101                | <i>E. coli</i> | BW25113 | -                                                                   | -       |                                                                                   |
| 161                | <i>E. coli</i> | BW25113 | <i>nfsA::mrp</i>                                                    | -       | kan <sub>30</sub>                                                                 |
| 243                | <i>E. coli</i> | BW25113 | <i>nfsA::mrp</i> , <i>λatt</i> ::pCs550-r                           | -       | kan <sub>30</sub> , chlor <sub>20</sub>                                           |
| 270                | <i>E. coli</i> | BW25113 | <i>nfsA::mrp</i> , <i>Tn7att::spy-dcas9</i>                         | -       | kan <sub>30</sub> , gent <sub>10</sub>                                            |
| 271                | <i>E. coli</i> | BW25113 | <i>nfsA::mrp</i> , <i>λatt</i> ::pCs550-r, <i>Tn7att::spy-dcas9</i> | -       | kan <sub>30</sub> , chlor <sub>20</sub> , gent <sub>10</sub>                      |
| 270-262            | <i>E. coli</i> | BW25113 | <i>nfsA::mrp</i> , <i>Tn7att::spy-dcas9</i>                         | pBAD24  | kan <sub>30</sub> , gent <sub>10</sub> , amp <sub>100</sub>                       |
| 270-168            | <i>E. coli</i> | BW25113 | <i>nfsA::mrp</i> , <i>Tn7att::spy-dcas9</i>                         | pRAU168 | kan <sub>30</sub> , gent <sub>10</sub> , amp <sub>100</sub>                       |
| 270-171            | <i>E. coli</i> | BW25113 | <i>nfsA::mrp</i> , <i>Tn7att::spy-dcas9</i>                         | pRAU171 | kan <sub>30</sub> , gent <sub>10</sub> , amp <sub>100</sub>                       |
| 270-173            | <i>E. coli</i> | BW25113 | <i>nfsA::mrp</i> , <i>Tn7att::spy-dcas9</i>                         | pRAU173 | kan <sub>30</sub> , gent <sub>10</sub> , amp <sub>100</sub>                       |
| 270-13             | <i>E. coli</i> | BW25113 | <i>nfsA::mrp</i> , <i>Tn7att::spy-dcas9</i>                         | pCSW13  | kan <sub>30</sub> , gent <sub>10</sub> , amp <sub>100</sub>                       |
| 270-18             | <i>E. coli</i> | BW25113 | <i>nfsA::mrp</i> , <i>Tn7att::spy-dcas9</i>                         | pCSW18  | kan <sub>30</sub> , gent <sub>10</sub> , amp <sub>100</sub>                       |
| 270-21             | <i>E. coli</i> | BW25113 | <i>nfsA::mrp</i> , <i>Tn7att::spy-dcas9</i>                         | pCSW21  | kan <sub>30</sub> , gent <sub>10</sub> , amp <sub>100</sub>                       |
| 270-26             | <i>E. coli</i> | BW25113 | <i>nfsA::mrp</i> , <i>Tn7att::spy-dcas9</i>                         | pCSW26  | kan <sub>30</sub> , gent <sub>10</sub> , amp <sub>100</sub>                       |
| 270-65             | <i>E. coli</i> | BW25113 | <i>nfsA::mrp</i> , <i>Tn7att::spy-dcas9</i>                         | pCSW29  | kan <sub>30</sub> , gent <sub>10</sub> , amp <sub>100</sub>                       |
| 271-262            | <i>E. coli</i> | BW25113 | <i>nfsA::mrp</i> , <i>λatt</i> ::pCs550-r, <i>Tn7att::spy-dcas9</i> | pBAD24  | kan <sub>30</sub> , chlor <sub>20</sub> , gent <sub>10</sub> , amp <sub>100</sub> |
| 271-168            | <i>E. coli</i> | BW25113 | <i>nfsA::mrp</i> , <i>λatt</i> ::pCs550-r, <i>Tn7att::spy-dcas9</i> | pRAU168 | kan <sub>30</sub> , chlor <sub>20</sub> , gent <sub>10</sub> , amp <sub>100</sub> |
| 271-171            | <i>E. coli</i> | BW25113 | <i>nfsA::mrp</i> , <i>λatt</i> ::pCs550-r, <i>Tn7att::spy-dcas9</i> | pRAU171 | kan <sub>30</sub> , chlor <sub>20</sub> , gent <sub>10</sub> , amp <sub>100</sub> |
| 271-173            | <i>E. coli</i> | BW25113 | <i>nfsA::mrp</i> , <i>λatt</i> ::pCs550-r, <i>Tn7att::spy-dcas9</i> | pRAU173 | kan <sub>30</sub> , chlor <sub>20</sub> , gent <sub>10</sub> , amp <sub>100</sub> |
| 271-13             | <i>E. coli</i> | BW25113 | <i>nfsA::mrp</i> , <i>λatt</i> ::pCs550-r, <i>Tn7att::spy-dcas9</i> | pCSW13  | kan <sub>30</sub> , chlor <sub>20</sub> , gent <sub>10</sub> , amp <sub>100</sub> |
| 271-18             | <i>E. coli</i> | BW25113 | <i>nfsA::mrp</i> , <i>λatt</i> ::pCs550-r, <i>Tn7att::spy-dcas9</i> | pCSW18  | kan <sub>30</sub> , chlor <sub>20</sub> , gent <sub>10</sub> , amp <sub>100</sub> |
| 271-21             | <i>E. coli</i> | BW25113 | <i>nfsA::mrp</i> , <i>λatt</i> ::pCs550-r, <i>Tn7att::spy-dcas9</i> | pCSW21  | kan <sub>30</sub> , chlor <sub>20</sub> , gent <sub>10</sub> , amp <sub>100</sub> |
| 271-26             | <i>E. coli</i> | BW25113 | <i>nfsA::mrp</i> , <i>λatt</i> ::pCs550-r, <i>Tn7att::spy-dcas9</i> | pCSW26  | kan <sub>30</sub> , chlor <sub>20</sub> , gent <sub>10</sub> , amp <sub>100</sub> |
| 271-65             | <i>E. coli</i> | BW25113 | <i>nfsA::mrp</i> , <i>λatt</i> ::pCs550-r, <i>Tn7att::spy-dcas9</i> | pCSW29  | kan <sub>30</sub> , chlor <sub>20</sub> , gent <sub>10</sub> , amp <sub>100</sub> |

**Table S3. Gene Sequence Information, Related to Figures 2, 3 and 5, STAR Methods and Table S2**

| <b>ΦJ0161a Frag1</b>                       |                                                                                                                                                                                                                                                                                                                                                                                                                                                                                                                                                                                                                                                                                                                                                                                                                                                                                                                                                                                                                                                                                                                                                                                                                                                                                                                                                                                                                                                                                                                                                                                                                                                                                                                 |                                                      |                                             |
|--------------------------------------------|-----------------------------------------------------------------------------------------------------------------------------------------------------------------------------------------------------------------------------------------------------------------------------------------------------------------------------------------------------------------------------------------------------------------------------------------------------------------------------------------------------------------------------------------------------------------------------------------------------------------------------------------------------------------------------------------------------------------------------------------------------------------------------------------------------------------------------------------------------------------------------------------------------------------------------------------------------------------------------------------------------------------------------------------------------------------------------------------------------------------------------------------------------------------------------------------------------------------------------------------------------------------------------------------------------------------------------------------------------------------------------------------------------------------------------------------------------------------------------------------------------------------------------------------------------------------------------------------------------------------------------------------------------------------------------------------------------------------|------------------------------------------------------|---------------------------------------------|
| <b>(reference plasmid)</b>                 | <b>Sequence</b>                                                                                                                                                                                                                                                                                                                                                                                                                                                                                                                                                                                                                                                                                                                                                                                                                                                                                                                                                                                                                                                                                                                                                                                                                                                                                                                                                                                                                                                                                                                                                                                                                                                                                                 | <b>Locus tag</b>                                     | <b>given name</b>                           |
| pRAU106                                    | ATGGATGACAAAATGGGAAAACTTATTGGTACAATGAAGGAACGACACACTGTTAACTGAAAAGGAATATAAAGCA<br>AAAATTGAAGTGAAGCAAAAAGTGGTTAGAAGACTTGAAGAAGATGAAGAAGACTTGAAGAGGGTGACAAAAC<br>TAGCCTCGAAACACTCATAAGTTATCGTATGAAAACGAAAGTATTTGTTCCATCTGATAGCGAAGGTAATAAAT<br>AGAAGAGTGGTAAAAATATAAACATAAAGGATGATGAAAATGACATTAACAGAGCACAAAAAAGTATGCAGAAG<br>CGATGCACGAGTTTATAATATGGTGGATGACTTTGAAGAGTCTACACCGGATTTGCAAAGGAAGTTCTACATGATT<br>CTGACTATGTAGTTATTACAAAAATGAAAAATATGCAGTAGCTCTTTGCTCTCTTAGCACTGATGAATGTGAATATGA<br>TACTAACTTACTAGTAAAAATGGTTGATTACTCAACAGTTGACGTAACCGGTGTGACATACTACATCAACATT<br>GTTGAACTAACGATATCGATGATTTAGAAATCGCTACGGATGAAGATGAGATGAAAAAGTGGCAACCAAGAAATATT<br>TAAAAAGTGAAGTGAAGTAAAAATATGACTATTAATATTAGATGAATCTTAAAAAGCATGATTTGACGAGGTA<br>TCAGTTAAGCAAAATTAACGGTATCTCACAACACTTTAAAAGACCAGAACGAAAAACCGTTAAATAAATACTGTT<br>TCAATACTACGCTCGCTATCGTTGATTTTCGGGTTTATCTGTATCAGATGTTTTTTGAATTAGAAGACATAGAAAAA<br>ATTCTGACGATCTTGACGATTTAACACCTGTTAGACAAGTACAACTCTCATTTCTGCACAAGAATTCGAATTT<br>ACTGCTTAATCAAAAGAGTTTGAAGTCTGCTAATATTGAAGTACTTCTTTACGTTCAATAGATTTGAAAACGAAAGACA<br>TGTAATATAAAAAAGATGTTTGAAGCGTTAGAAAAATGCTATCACCCTGTTAAAAGAGAAGAAAAATGAGTACTT<br>TGATAAGTTTAAAAGGAAGTGAACACTAGTGAACAATCATGTTATAGATTTGACAAATAGAAAAATTTGGAAGATTAACA<br>GTTAAAGAGTTTGTCTGTTCTGAAAATGGTAAACGCTTATGGAAGTCTTTTGTGTATGCGGCAATGAAAAAGAGTA<br>TTAGCTCAACATTTAAACGTTGCTGTTCAATCTTTCGGGTTGTTAGCTCGAGACAACGGGCGTAAACATGCAGA<br>TAAAAATTTGAGGTCAGAAACAGCACAAAAAACGCCCTTAAAAGAAAACTAGAAGTAGACGCAGTCTGATGGCATA<br>TGAATCAGCTTTAACTAGAAGCCTATCAGCAAGAACAGAGTGGGATAAAAGCGTGCCTTGGGATGAGAAAAA<br>AATAAATGGGAAGCTTCTATTACCTTTCAAAAAAATACATTTTTTAGGCAGATTTGAAAAAGAAAGATGATGCCGTAA<br>AAGCACGTAGAGATCGGGAAGATAAATACTTTAAACCGATTTAGATAAAATGAATTGA | LMOG_03145<br>LMOG_03146<br>LMOG_03147<br>LMOG_03148 | orfB<br>acrIIA1<br>acrIIA2<br>orfA          |
| <b>plasmid inserts for targeting assay</b> |                                                                                                                                                                                                                                                                                                                                                                                                                                                                                                                                                                                                                                                                                                                                                                                                                                                                                                                                                                                                                                                                                                                                                                                                                                                                                                                                                                                                                                                                                                                                                                                                                                                                                                                 |                                                      |                                             |
| <b>(reference plasmid)</b>                 | <b>Sequence</b>                                                                                                                                                                                                                                                                                                                                                                                                                                                                                                                                                                                                                                                                                                                                                                                                                                                                                                                                                                                                                                                                                                                                                                                                                                                                                                                                                                                                                                                                                                                                                                                                                                                                                                 |                                                      | <b>notes</b>                                |
| pNT (RAU29)                                | AAGCTTTATATGGTCTTTTCGCTTTCACAAGATACTTTTGTGGTTGGATCC                                                                                                                                                                                                                                                                                                                                                                                                                                                                                                                                                                                                                                                                                                                                                                                                                                                                                                                                                                                                                                                                                                                                                                                                                                                                                                                                                                                                                                                                                                                                                                                                                                                             |                                                      | matches spacer 1 of the J0161 CRISPR array  |
| pT (RAU31)                                 | AAGCTTTATATCGTGATTTCTCTCATGCGCGCTTTTGTGGTTGGATCC                                                                                                                                                                                                                                                                                                                                                                                                                                                                                                                                                                                                                                                                                                                                                                                                                                                                                                                                                                                                                                                                                                                                                                                                                                                                                                                                                                                                                                                                                                                                                                                                                                                                |                                                      | matches spacer 1 of the 10403s CRISPR array |
| <b>candidate inhibitors</b>                |                                                                                                                                                                                                                                                                                                                                                                                                                                                                                                                                                                                                                                                                                                                                                                                                                                                                                                                                                                                                                                                                                                                                                                                                                                                                                                                                                                                                                                                                                                                                                                                                                                                                                                                 |                                                      |                                             |
| <b>(reference plasmid)</b>                 | <b>Sequence</b>                                                                                                                                                                                                                                                                                                                                                                                                                                                                                                                                                                                                                                                                                                                                                                                                                                                                                                                                                                                                                                                                                                                                                                                                                                                                                                                                                                                                                                                                                                                                                                                                                                                                                                 | <b>Locus tag</b>                                     | <b>given name</b>                           |
| pRAU153                                    | ATGAACAATCATGTTATAGATTTGACAAATAAGAAATTTGAAGATTAAACAGTTAAAGAGTTTGTCTGTTCTGAAAAATG<br>GTAACCGGTTATGGAACCTGTTTTGTGTATGCGGCAATGAAAAAGAAAGTATTAGCTCAACATTTAAAACGGTGCATG<br>TTCAATCTTGGCGTTGTTAGCTCGAGACAACGGCGTAAACATGCAGATAAAAAATTTGAGGTGAGAACAGCACAA<br>AAAAACGCCCTTAAAAGAAAACTAGAAGTAGACGCAGTGCATGGCAGTAAATGAAATCAGCTTAACTAGAAAGCCTATC<br>AGCAAGAAACAAGAGTGGGATAAAAGCGTGCCTTGGGATGAGAAAAAGAAATAAATGGGAAGCTTCTATTACCTTTC<br>AAAAAAAATACATTTTTAGGCAGATTTGAAAAAGAAAGATGATGCCGTAAGCACTGATAGAGATGCGGAAGATAAAT<br>ACTTAAACCGATTTAGATAAAATGAATTGA                                                                                                                                                                                                                                                                                                                                                                                                                                                                                                                                                                                                                                                                                                                                                                                                                                                                                                                                                                                                                                                                                                                                                                        | LMOG_03145                                           | orfB                                        |
| pRAU154; pRAU168                           | ATGACTATTAATATTAGATGAATCTTAAAAAGCATGATTTGACGAGGTATCAGTTAAGCAAATTAACGGTATCT<br>CACAAAAACACTTTAAAAGACCAGAACGAAAAACCGTTAAATATAATACTGTTTCACTACGCTCGCTATCGTTGA<br>TTTTGGGTTTATCTGTATCAGATGTTTTGTTGAATAGAAAGACATAGAAAAAATTTGACGATCTTGCAGGATTTAA<br>ACACCTGTTAGACAAGTACAACTCTCAATTTCTGCACAAGAAATCGAATTATAGCTTAACTCAAAAGAGTTTGAAGT<br>TGCTAATTTGAAGTACTTCTTTACGTTCAATAGATTTGAAAACGAAGCACTGTAATATAAAAAAGATGTTTGT<br>AAAGCGTTAGAAAAATGCTATCACCCTGTTAAAAGAGAAGAAAAATGAGTACTTTGA                                                                                                                                                                                                                                                                                                                                                                                                                                                                                                                                                                                                                                                                                                                                                                                                                                                                                                                                                                                                                                                                                                                                                                                                                                            | LMOG_03146                                           | acrIIA1                                     |
| pRAU155; pRAU171                           | ATGACATTAAACAGAGCACAAAAAAGTATGCAGAAAGCGATGCACGATTTAATAATATGGTGGATGACTTTGAAGA<br>GTCTACACCGGATTTGCAAAGGAAGTCTACATGATTTGACTATGATGATTACAAAAAATGAAAAATATGCAGT<br>AGCTTTTGTCTCTTAGCACTGATGAATGGAATATGATACTAACTTATAGATGAAAAAATTTGGTGTATTACTCA<br>ACAGTGTACGTAACCGGTGTGACATACTACATCAACATTTGTTGAACTAACGATATCGATGATTTAGAAATCGCTACG<br>GATGAAGATGAGATGAAAAGTGGCAACCAAGAAATTTTTAAAAGTGAAGTGAAGTAA                                                                                                                                                                                                                                                                                                                                                                                                                                                                                                                                                                                                                                                                                                                                                                                                                                                                                                                                                                                                                                                                                                                                                                                                                                                                                                                          | LMOG_03147                                           | acrIIA2                                     |
| pRAU162; pRAU173                           | ATGGATGACAAAATGGGAAAACTTATTGGTACAATGAAGGAACGACACACTGTTAACTGAAAAGGAATATAAAGCA<br>AAAATTGAAGTGAAGCAAAAAGTGGTTAGAAGACTTGAAGAAGATGAAGAAGACTTGAAGAGGGTGACAAAAC<br>TAGCCTCGAAACACTCATAAGTTATCGTATGAAAACGAAAGTATTTGTTCCATCTGATAGCGAAGGTAATAAAT<br>AGAAGAGTGGTAA                                                                                                                                                                                                                                                                                                                                                                                                                                                                                                                                                                                                                                                                                                                                                                                                                                                                                                                                                                                                                                                                                                                                                                                                                                                                                                                                                                                                                                                        | LMOG_03148                                           | orfA                                        |
| pCSW3; pCSW13                              | ATGTATATAGTAAAGGAACGGGAGGAATATACAGTGAATAAATTTGCATTTGAAAATGATAGATATCTAGAACGAAAT<br>ATCAAGGCAGTTGATAGAAAAATGCAAGGGACTTTAATTTGCACATAAAAAAGTAAATACAGCAAGGATTTGTAATTC<br>ACTATAGTTGCTGATAATTCATTGATAATATCGAAAACGCTGTTATATTTTGAAGTAAAAAGAGAAAGTGAAGAA<br>CGTGTCAAGATCATCAATTTACGCGGAATATGAATGTGATGAAGATGGCAACGAATATTTGATTAACAATTAAT<br>TTACGGTTCTAGCGCTAATCAAATAAACACGGTACAAGGGATAAATCAAGTAAATATGCTTCTGTATTGTTT<br>CTGACACAGCAATCAATATCTAAATCAATTCATGAATGAATCTTAAAAAGAGAAGAACAGCAAGAAAGCATGGA<br>ATAAAAAAGAAAGCGGAATACGCTATCAGAAAAACAGGCATATGATCTCAAGCGAACCGGAAAAATACGAAGACATT<br>TTGATTTACCTTTCGATTTCTATGATTATTTGACAAAAAGAAAAATGGATGATCTAA                                                                                                                                                                                                                                                                                                                                                                                                                                                                                                                                                                                                                                                                                                                                                                                                                                                                                                                                                                                                                                                                           | Imoslcc2482_068<br>5                                 | orfC                                        |
| pCSW7; pCSW18                              | ATGGCCGGATTTATTAATAAATACCTAGAAAAACAAGAAATGGCAATTTATCAATTAGGCAATGCAACTGGACTGGCA<br>CATCAAAACAATAAGAAGCGCTGATTCAAAAACTGTTGACCAATGTCTGCAAAAAATGTGCGTTTTAATAGCGGACGTT<br>TTGCGATTTACACCTGGTGAATCTTAGACGAATTTACGAAATGAAGAAGAAATAAATATGATGCTATTATACAA<br>GAATTAATTAATGATTTGAAAAATACGGCTATAACACAGATGAAATAAGCCTTGAATGCTAGATGGTAAAAAATTA<br>AGCTGGAATGCTGATGATACTATAACGCAACTCGCTGACGCTGTTAATGCTACTAACACCTTTACGGCATATGTG<br>GATGCTTACTGATTTTATGATTATAGAAAAATTTGA                                                                                                                                                                                                                                                                                                                                                                                                                                                                                                                                                                                                                                                                                                                                                                                                                                                                                                                                                                                                                                                                                                                                                                                                                                                          | Imoslcc2540_127<br>7                                 | orfD                                        |
| pCSW9; pCSW21                              | ATGAATTAATGACTTAATTAGAGAAATCAAAAAACAAGATTACACAGTGAATTTAGTGGTACGGATAGCAATAGT<br>ATCACACAGCTAATTTTCGGTAAATGATGGCAACGAGTATGTAATTTCTGAAAGTGAATGAATCAATCGTT<br>GAAAAATTCATCTCGCTTCAAAACGGTGGAAATCAAGAAATACGAGGATGAAGAAGAAATTTATAATGACATGCAA<br>ACAATCACCTAAAAAGTGAAGTGAACATA                                                                                                                                                                                                                                                                                                                                                                                                                                                                                                                                                                                                                                                                                                                                                                                                                                                                                                                                                                                                                                                                                                                                                                                                                                                                                                                                                                                                                                         | LMOG_02993                                           | acrIIA4                                     |

pCSW29; pCSW65 ATGTTTAATAAGGCTGAAATTGAAACAAGCTTGAATTGGTTCAACGATAGCAACATCTGGTTAAGCGATATTGAA 8  
TGGGTAAGTTACACAGACAAGAAAAATCTTTCTCCGTTTGTAAAAGCTGCTTGGTCTAAGCGAAAGAAAGATT  
8  
GAAGAATCTAAAAAGAAAGCAACATATTGCTAAAAGCGAAGAGTTGAAAGCTTGGAAATGGGCTGAACGAAAT  
AGGCTTACACTTTAATTTTCAGATGATGAAAAATTCACAGTGTAAAAGATGAAACTAAAAATAATTTCCGCTTAAGT  
pCSW33 ATGCAAAACAATAGACAGAAATGAAATCGCTAAAGATATCAATGCTAAAATTTTCAGGACTTGGACGTAATATAAGAACT 8  
AAGTGGGAATAGGTTTCGAGGAAGGCCAAGTAATTACATTAGAAAAGCAAGAAAGTTGGACAGATGGTGGCGATTT  
8  
CACTGTTTGTAAATGATTGCCCGGTGGAATATAATTTTAAAATTGAAAACGAAGCACCTTGGCCAGTTGATAGATTATAG  
CAACAAAGAAGAAGCAACAGCGCTAGGTGCGAAGATTGCGAAAACGAAAAAGAAAGTATTATTGCCTGTTGGAACATA  
AGTTAGAAAGTTGTGTACGGAGAACCGGAAGACGATAAAAGACGACATGGGATTTTACACAGTGATTTTCAGATATATT  
GAAAGTGAGGAAAAATAA  
pCSW35 ATGTCATAAAAACTATTAGATGAATCTTAAAAAACACAATAAAACGAGGTATCAGTTAAGCAAACACTGACTGGTATCT  
LMOG\_02992 acrlIA1  
CGCAAAACACATTGAACGATTACAATAAAAAAGAGTTAAACAAGTATTCTGTTTCATTCTTGCAGCACTCTCAATGT  
GTGCAAGGAATATCTACATTTGATGTTTTCAACGAAGTGAAGAATTGAAAAAACTATGATGATCTCGCAGGATTTA  
AGCACTTGTAGATAAGTATAAGTTGCTATTTTCAAGCGAAGAAATCGAATTTACTGCTTAATCAAGAGATTTGAAAT  
TGCGAACATTGAAGTCTCCCTTTTACATTTAATAGATTGAAAAATGAAACGCAATGATATAGAAAAAGATGTTCCG  
AAAAGCACTGAAAAATGCTATCACTGTGTTAAAAGAGAAGAAAAACGAATTGATATAA

| GeneBlock ID | Sequence                                                                                                                                                                                                                                                                                                                                                                                                                                                                                                                                                                                                                                                                                                                                                                                                                                                                                                                                                                                                                                                                                                                                                                                                                                                                                                                                                                        | Locus tag | given name |
|--------------|---------------------------------------------------------------------------------------------------------------------------------------------------------------------------------------------------------------------------------------------------------------------------------------------------------------------------------------------------------------------------------------------------------------------------------------------------------------------------------------------------------------------------------------------------------------------------------------------------------------------------------------------------------------------------------------------------------------------------------------------------------------------------------------------------------------------------------------------------------------------------------------------------------------------------------------------------------------------------------------------------------------------------------------------------------------------------------------------------------------------------------------------------------------------------------------------------------------------------------------------------------------------------------------------------------------------------------------------------------------------------------|-----------|------------|
| gJH009       | TAAGCTTGGTACCGAGCTCGGATCCGCCACCATGACCATCAAGTTGCTCGACGAATTTCTCAAGAACATGATCTTA<br>CCCGGTACCAACTGTCTAACTGACTGGCATTCTCAAATACCTTGAAGATCAGAATGAAAGCCCTTGAATAAGT<br>ACACTGTATCCATACTCAGAAGTCTCAGCTTGATTTCCGGTCTGAGCGTAGCGATGACTTTTTGAACTTGAAGACA<br>TAGAAAAGAATCTGATGACTTGGCTGGATTCAAGCACCTCCTCGATAAATACAACTCTCCTTCCAGCACAGAAT<br>TTGAACTCTACTGCCCTTATAAAGAATTCGAGTCCGCAAAATATCGAAGTTCTCCATTACAGTTTAAATAGATTCGAGA<br>ACGAGGAACATGTAATATTAAGAAGGATGTCTGCAAGGCTCTTAAAAATGCCATCACCGTCTGAAGGAAAAAAA<br>AATGAGCTGCTTGAAGAATTCGCAGATATCCAGCACAGT<br>gJH010 TAAGCTTGGTACCGAGCTCGGATCCGCCACCATGACGCTGACCCGCGCTCAGAAAAAATACGCCGAGGCGATGCA<br>Imog_03147 AcrlIA2<br>TGAGTTTATCAATATGGTTGATGACTTTGAAGAATCAACGCTGACTTTGCAAAAGAGGTTCTGCACGACTCCGACT<br>ATGTGGTCAATACAAAAACGAGAAATATGCCGTGGCACTCTGTAGTCTCCACAGATGAATGTGAGTACGATACT<br>AACTTGTATTTGGATGAAAAGCTCGTGCATTACAGCACAGTTGATGTCACGGAGTGACATATTACATCAATATAGTG<br>GAAAACAATGACATAGATGATCTTAAAATGCCGACCGAGGACGAGATGAAGTCTGGAACCAAGAGATTATTCT<br>TAAGTCCGAAGTGAAGTAAGAATTCGCAGATATCCAGCACAGT<br>gJH011 TAAGCTTGGTACCGAGCTCGGATCCGCCACCATGGATGATAAAATGGGAAAAAATCTACTGGTACAATGAAGGAACG<br>Imog_03148 OrfA<br>ACACTCTTTTGACAGAAAAAGAGTATAAAGCCAAAGATCGAATCAGAAGCAAGGAGTGGCTTGAGGACCTTCAGGAG<br>GACGAGGAAGAACTGGAAGAAGGAGACAAGACGAGTCTGGAGACCTTGATACAGTTGAGCTATGAAAACGAAAGTG<br>ACTTTGTTCCGTCGACAGCGAGGAAATAAGCTCGAAGAAATGTAAGAATTCGCAGATATCCAGCACAGT |           |            |
| gJH012       | TAAGCTTGGTACCGAGCTCGGATCCGCCACCATGACAAAGTATAATAAGTCAGAGATAATGAAAAACGATGGGCG<br>ATGTTTAACAGCTATGAATGGGATGTTGAAAAATTTAAATTCGTGAGTGCTGAGAACAAGACCTTCTAATTTGCCCTC<br>AAGGAAGCCTGGGCAGAGAGAAGGAATATGTCGAGAGGAAAGCCAAAGAAACAGCCGAGGCGCCCGGTCTGAG<br>GAGGCTAAAGCATGGGACTGGGCGTGCAGAAAAATGAATGTAACGATTTGCAGAACATTGACGCCACTGACAAAG<br>TCTTCTATGTGGTTGACATGCAAAAAAGAAATGTGGACTTCCAATGTGTGGGCGCAGGCAATCAAGGCTGTAGAAGT<br>TATGTGAAGCTCGGCTTTGCTTAAAGAAATTCGCAGATATCCAGCACAGT<br>gJH013 TAAGCTTGGTACCGAGCTCGGATCCGCCACCATGAACATTAACGACCTCATAACGAGAGATTAAGAACAAGATTACA<br>Imog_02993 AcrlIA4<br>CCGTCAAACTGTGAGAACTGATAGTAACTCAATCACCCAGCTTATTATCAGGGTAAACAATGATGGGAATGAATAT<br>GTGATATCTGAGAGCGAAAAACGAGTCTATCGTGAGAAATTCATTTCCGCTTTTAAAGAACGGTGGAAATCAGGAATA<br>TGAGGATGAAGAAGAAATTTACAATGACATGACAGCAGTACGTTGAAAAGTGAACGAACTAAGAATTCGCAGAT<br>ATCCAGCACAGT                                                                                                                                                                                                                                                                                                                                                                                                                                                                                                                                  |           |            |
