# Supplementary material
Source: PubMed Central journal article supplement (PMC5235966)

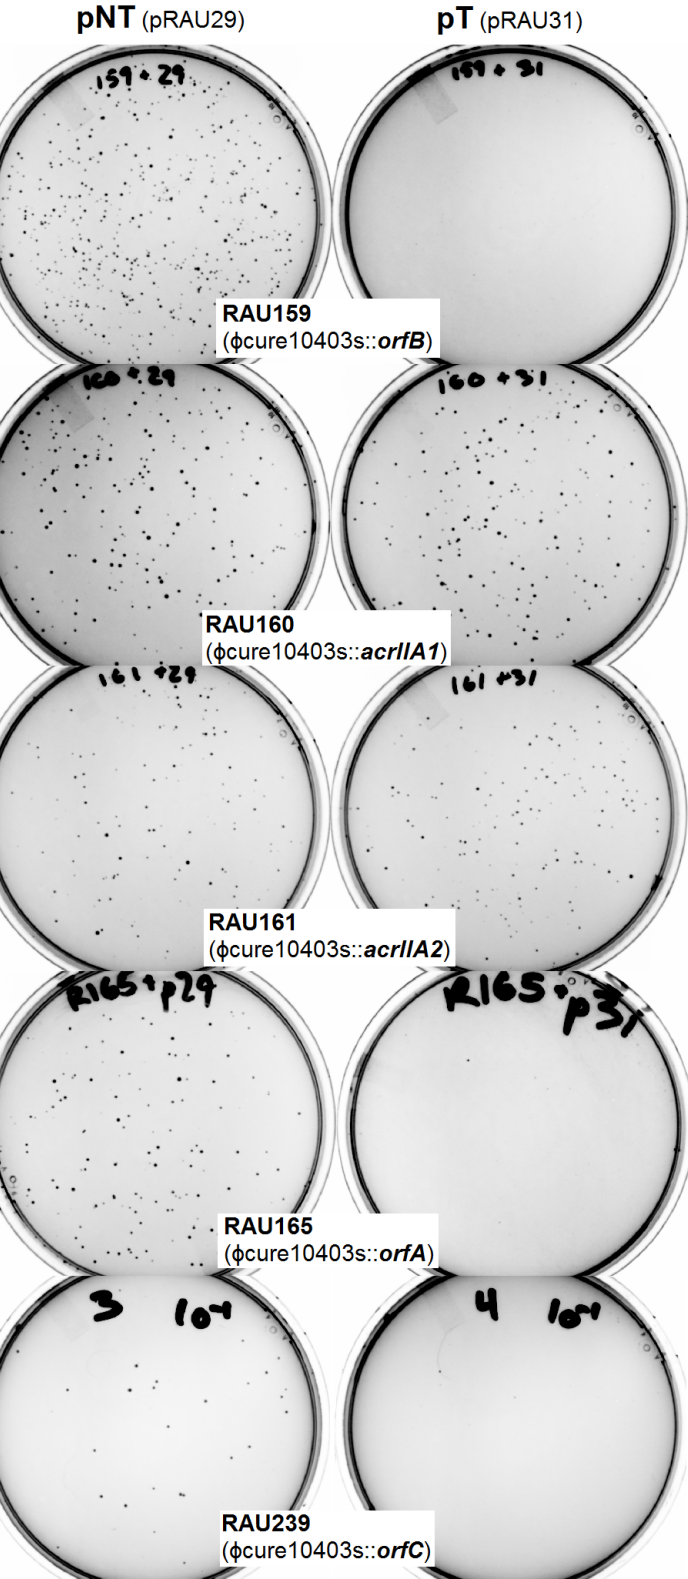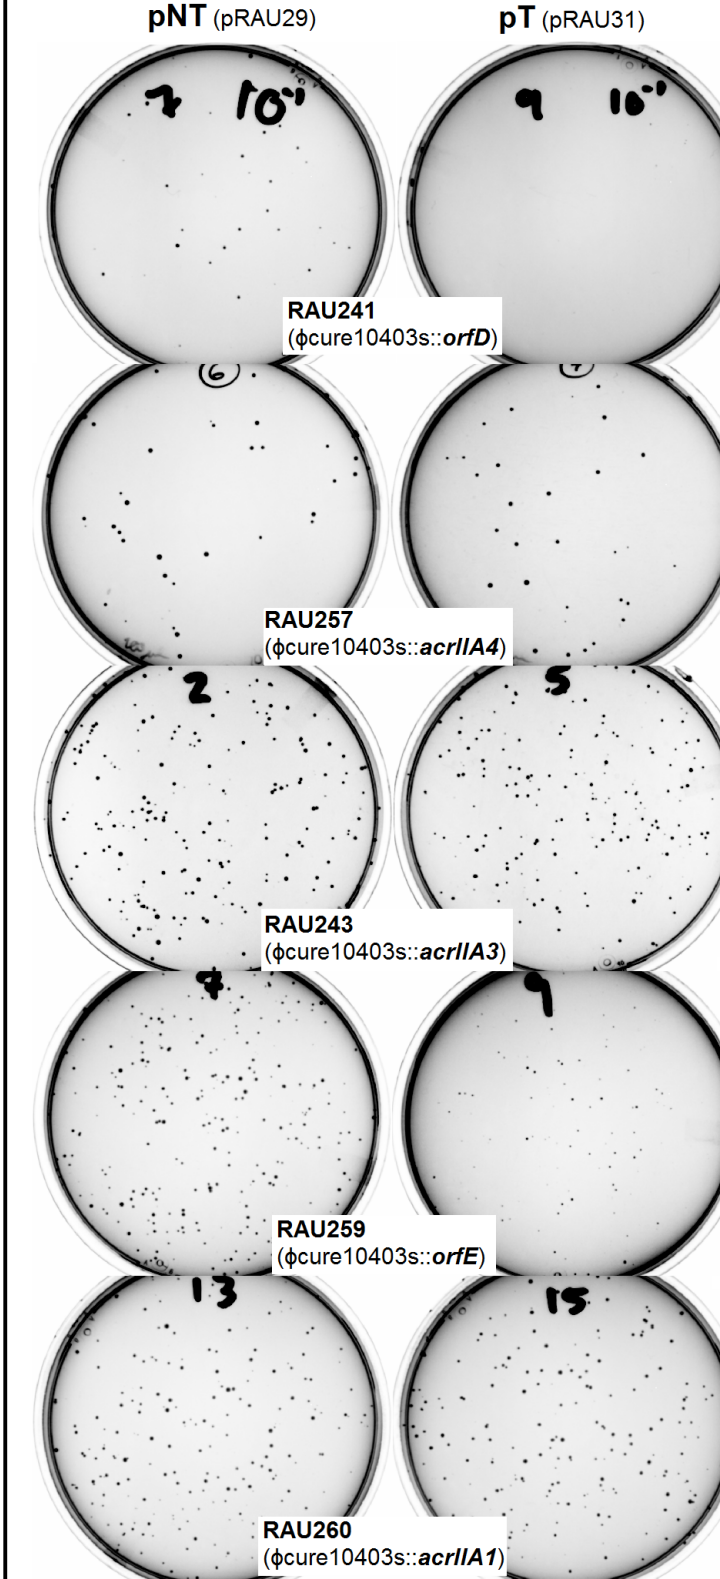

Supplement: NIHMS835612-supplement-3.pdf [file NIHMS835612-supplement-3.pdf]

No sgRNA

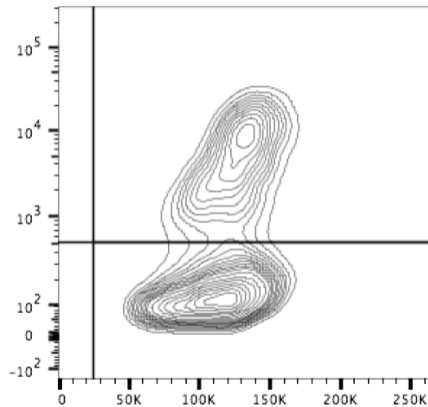

eGFP sgRNA

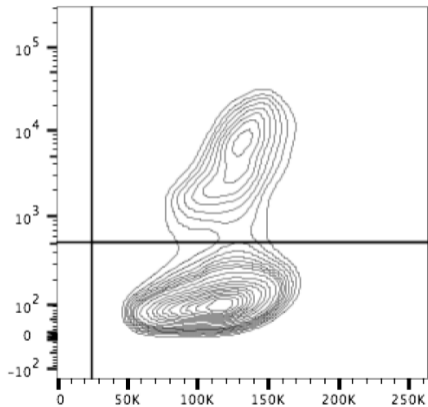

eGFP sgRNA  
+Lmog\_02993

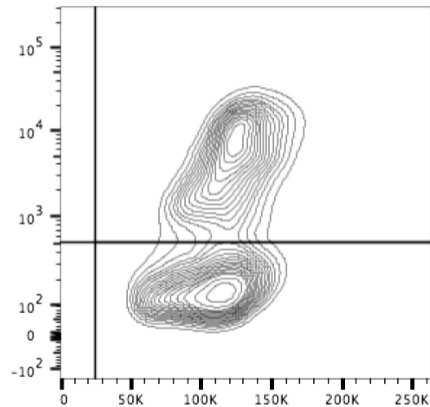

FSC

Supplement: NIHMS835612-supplement-5.pdf [file NIHMS835612-supplement-5.pdf]

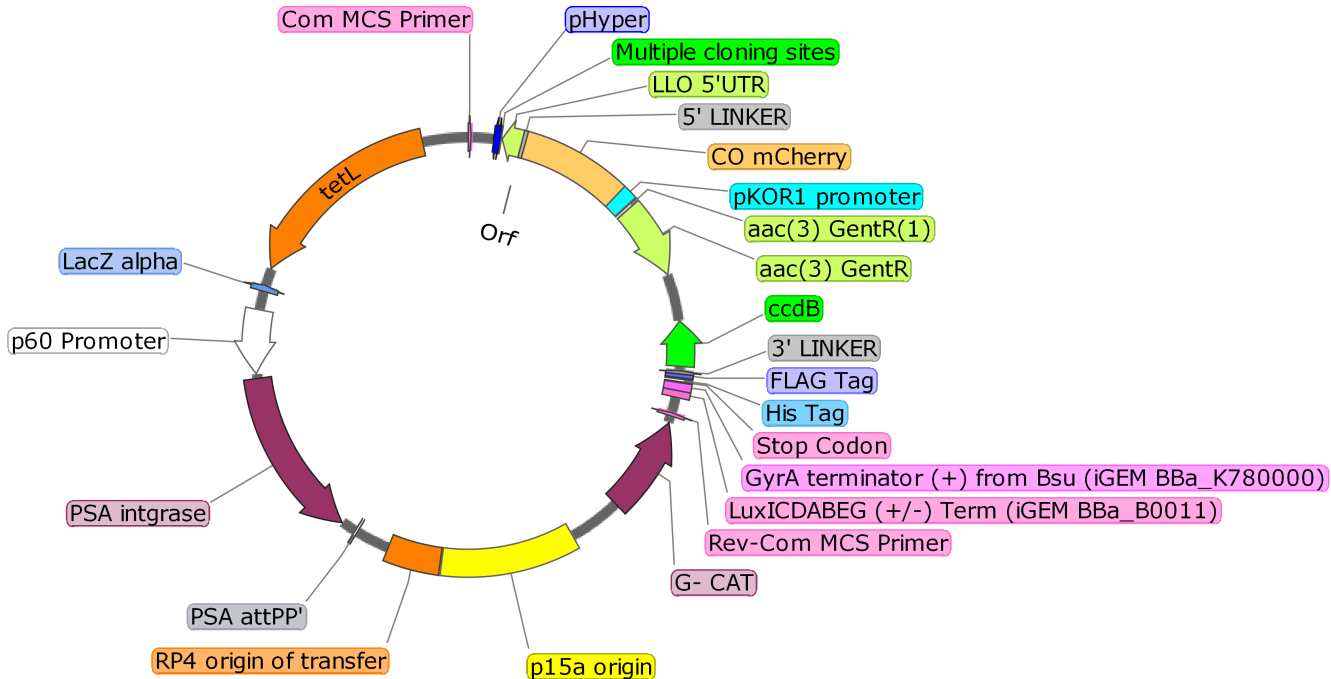

**20160420 GA177 pPL2oexL FLAG**

8986 bp

Supplement: NIHMS835612-supplement-6.pdf [file NIHMS835612-supplement-6.pdf]
